# Supplementary material
Source: Springer Nature journal article supplement (https://www.springermedizin.de/resource/supplementary/12884_2013_1160_MOESM4_ESM.pdf/9459068)
Supplement: MOESM4 [file 9459068]

**P  
e  
r  
c  
e  
n  
t  
a  
g  
e**

60.00  
50.00  
40.00  
30.00  
20.00  
10.00  
0.00

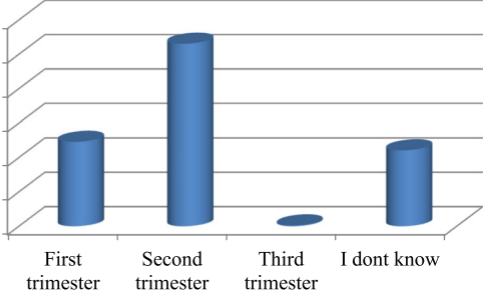

First  
trimester

Second  
trimester

Third  
trimester

I dont know

**Percieved Right time for ANC Booking**
